# Supplementary material for: Geotechnical Properties from Portable Free Fall Penetrometer Measurements in Coastal Environments
Source: Atypon-hosted journal article supplement (doi:10.1061/jggefk.gteng-11013), 2023-10-13
Supplement: supplemental_materials_jggefk.gteng-11013_jaber.pdf [file supplemental_materials_jggefk.gteng-11013_jaber.pdf]

## SUPPLEMENTAL MATERIALS

*ASCE Journal of Geotechnical and Geoenvironmental Engineering*

# Geotechnical Parameters from Portable Free Fall Penetrometer Measurements in Coastal Environments

Reem Jaber and Nina Stark

**DOI:** 10.1061/JGGEFK.GTENG-11013

© ASCE 2023

[www.ascelibrary.org](http://www.ascelibrary.org)

Datasets were compiled from Delaware Bay (DB), Delaware; Pea Island (PI), North Carolina; the York River (YR), Virginia; the Potomac River (PR), Maryland; the James River (JR), Virginia; the Brazos River (BR), Texas, and Yakutat Bay (YB), Alaska (Fig. S1). A summary of the location names and site numbers referred to in this paper is presented in Table S1.

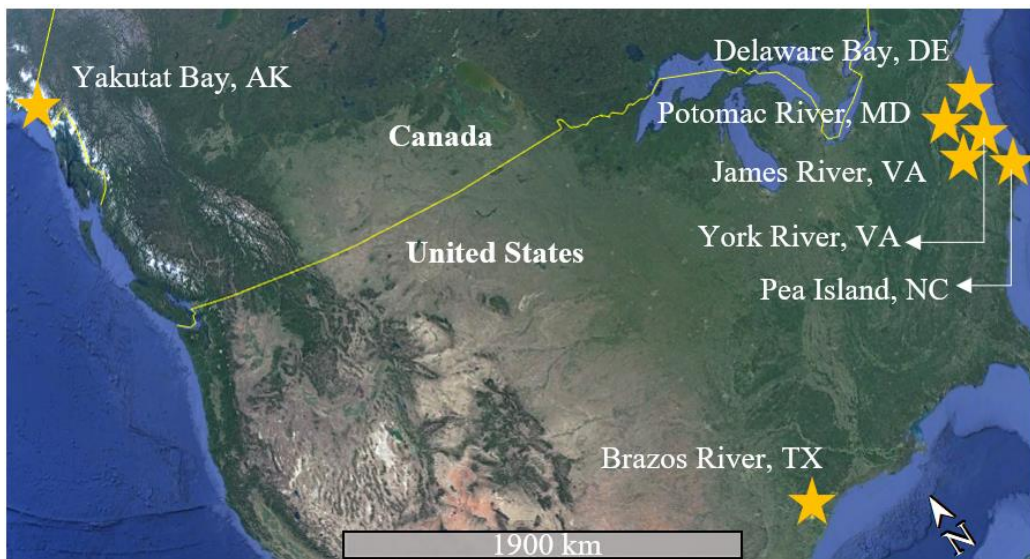

**Figure S1. Map with the different dataset locations (Map data from Google, SIO, NOAA, U.S Navy, NGA, GEBCO.)**

**Table S1. Location names, abbreviations and site numbers for the different sites referred to in this paper.**

| Location      | Abbreviation | Site number referred to in this paper | Representative coordinates    |
|---------------|--------------|---------------------------------------|-------------------------------|
| Delaware Bay  | DB           | DB1-9                                 | 38°52'32.21"N; 75°12'46.00"W  |
| Pea Island    | PI           | PI1-5                                 | 35°45'53.46"N; 75°31'26.07"W  |
| York River    | YR           | YR1-4                                 | 37°20'36.96"N; 76°37'21.72"W  |
| Potomac River | PR           | PR1-2                                 | 38°26'38.62"N; 77°16'35.05"W  |
| James River   | JR           | JR1-4                                 | 36°59'3.33"N; 76°19'27.18"W   |
| Brazos River  | BR           | BR1                                   | 29°34'21.16"N; 95°41'51.65"W  |
| Yakutat Bay   | YB           | YB1-5                                 | 59°33'56.16"N; 139°44'19.43"W |

Figure S2a demonstrated the effect of  $R_d$  on the calculated  $q_{net,dyn}$  by choosing five different random  $R_d$  profiles (Fig. S3), where  $R_d$  magnitude and changes with depth control the shape of the estimated  $q_{net,dyn}$  – depth profile (Fig. S2a colored lines). A perfect match between the measured  $q_{net,dyn}$  – depth profile (Fig. S2a dashed back line) was achieved for the relative density profile  $R_{d1}$  (Fig. S2a dark red lines; Fig S3). Here, a best match was achieved with  $Q = 6$ .  $R_{d1}$  represents a layered density profile with a loose sand top layer of  $\sim 8$  cm in thickness over medium dense sands. This represents a reasonable scenario considering local sediment transport and deposition processes (Stark et al. 2012). For Fig. S2a,  $Q$  and  $c_v$  were kept constant at 6 and  $0.031 \text{ m}^2/\text{s}$ , respectively. Figure S2b shows variations of estimated  $q_{net,dyn}$  – depth profiles when applying the relative density profile  $R_{d1}$  and  $c_v = 0.031 \text{ m}^2/\text{s}$  but varying  $Q$  from 5 to 10. Figure S2c shows the effect of  $c_h$  for six different values ranging from  $0.00031$  to  $0.031 \text{ m}^2/\text{s}$ , representing a standard range for  $c_h$  in sandy soil and as suggested by White et al. (2018).

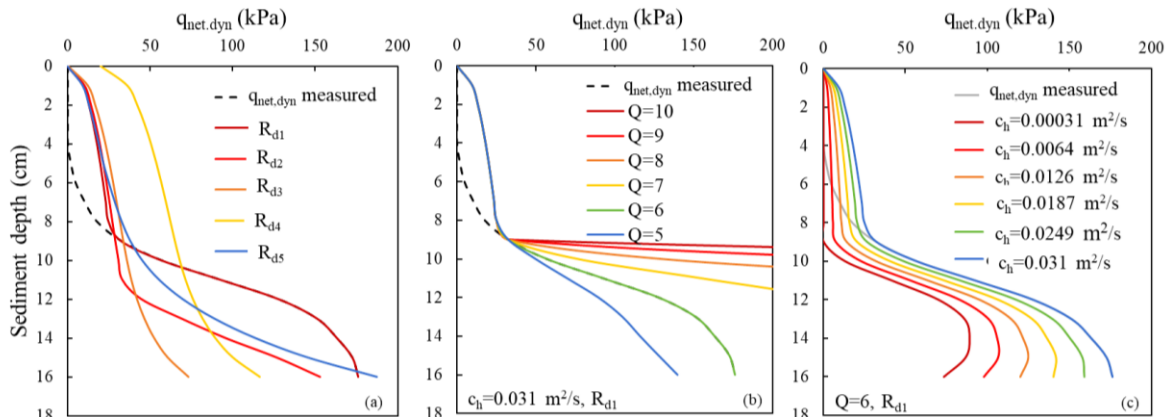

**Figure S2. Estimated values of  $q_{net,dyn}$  profiles for DB-7 based on White et al. (2018) approach assuming (a) different  $R_d$  values (b) different  $Q$  values and (c) different  $c_h$  values.**

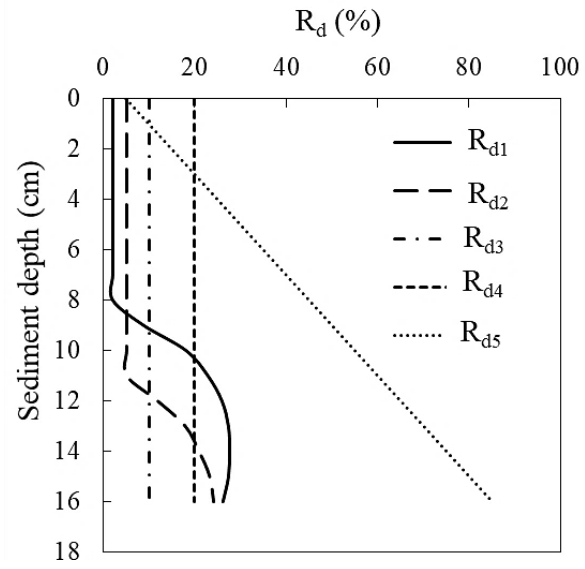

**Figure S3. Profiles of relative density ( $R_d$ ) values used in Fig. 3.**

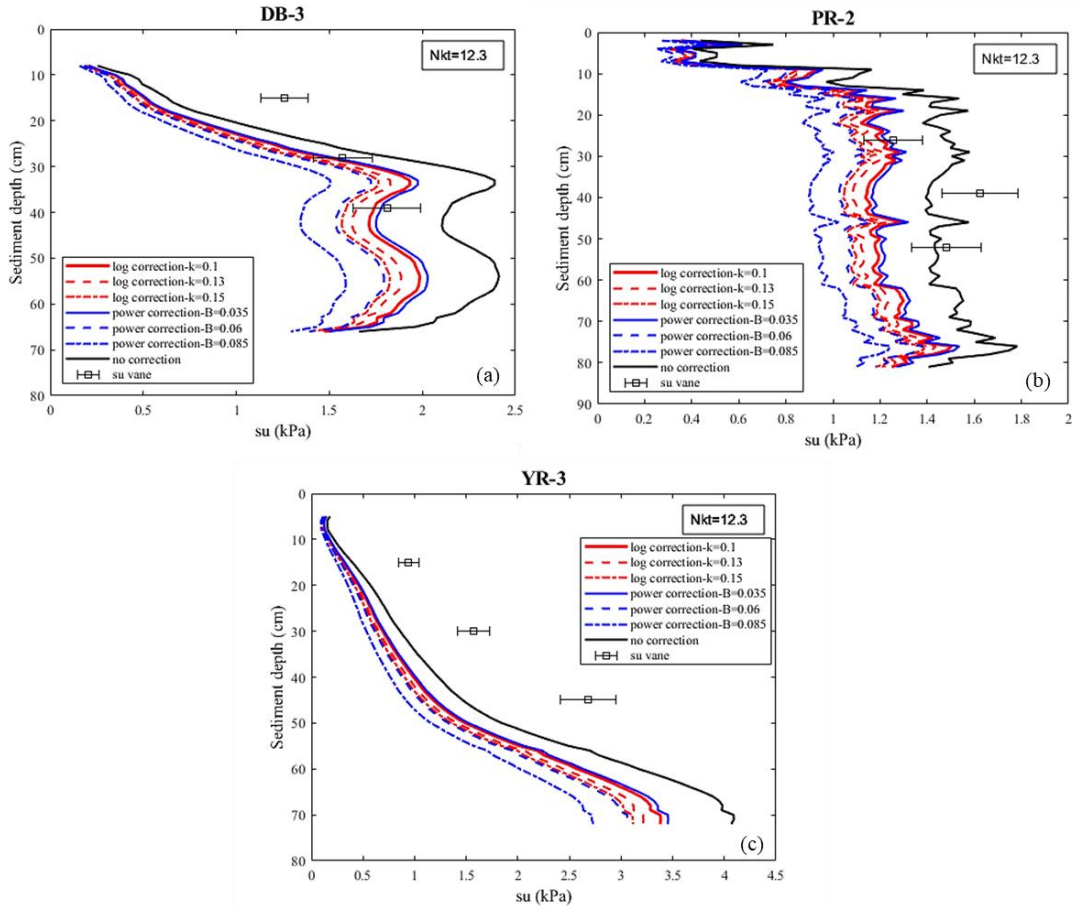

**Figure S4. Results of estimated  $s_u$  profiles with depth and measured  $s_u$  vane values at different depth with 10% uncertainty (black boxes) using log strain rate correction with  $k$  between 0.1-0.15 (red color), power law correction with  $\beta$  between 0.035-0.085 (blue color), and no strain rate correction (black color) for (a) DB-3, (b) PR-2, (c) YR-3 for  $N_{kt}=12.3$ .**

## References

- Stark, N., Coco, G., Bryan, K. R., & Kopf, A. 2012. "In-situ geotechnical characterization of mixed-grain-size bedforms using a dynamic penetrometer." *Journal of Sedimentary Research*, 82(7), 540-544. <https://doi.org/10.2110/jsr.2012.45>
- White, D. J., O'Loughlin, C. D., Stark, N., & Chow, S. H. 2018. "Free fall penetrometer tests in sand: Determining the equivalent static resistance." In *Cone penetration testing 2018: Proc. of the 4th international symposium on cone penetration testing*, 695-701. Boca Raton, FL, USA.
